# Supplementary material for: Effect of HIF‐1α/miR‐10b‐5p/PTEN on Hypoxia‐Induced Cardiomyocyte Apoptosis
Source: PubMed Central journal article supplement — J Am Heart Assoc. 2019 Sep 4;8(18):e011948. doi: 10.1161/JAHA.119.011948 (PMC6818010; doi:10.1161/jaha.119.011948), 2019-09-04
Supplement: JAH3-8-e011948-s001.pdf [file JAH3-8-e011948-s001.pdf]

# **SUPPLEMENTAL MATERIAL**

Figure S1. The ischemic area of NC and miR-10b-5p infection cardiac.

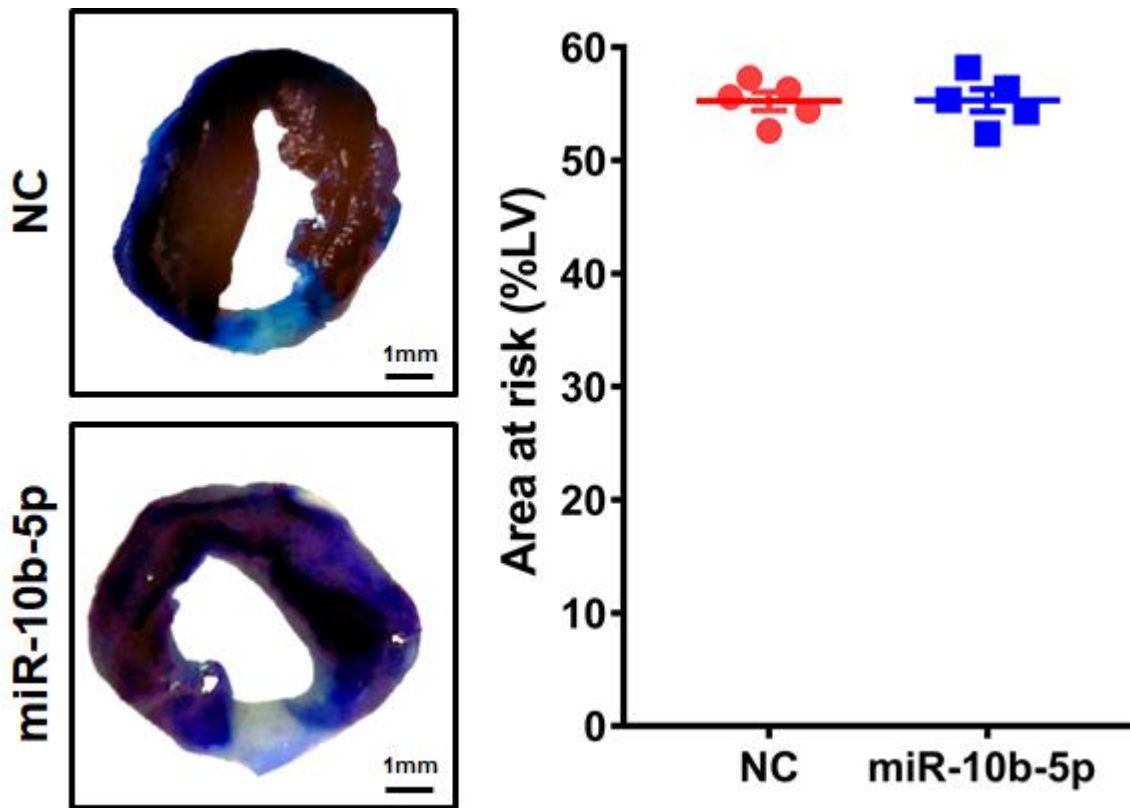

The sections of cardiac tissues were stained with Evans blue and TTC at day 2 post-surgery. The results of area at risk /left ventricular (LV) area were measured.
